# Supplementary material for: Expression and pathological effects of periostin in human osteoarthritis cartilage
Source: Springer Nature journal article supplement (doi:10.1186/s12891-015-0682-3), 2015-08-19

**A**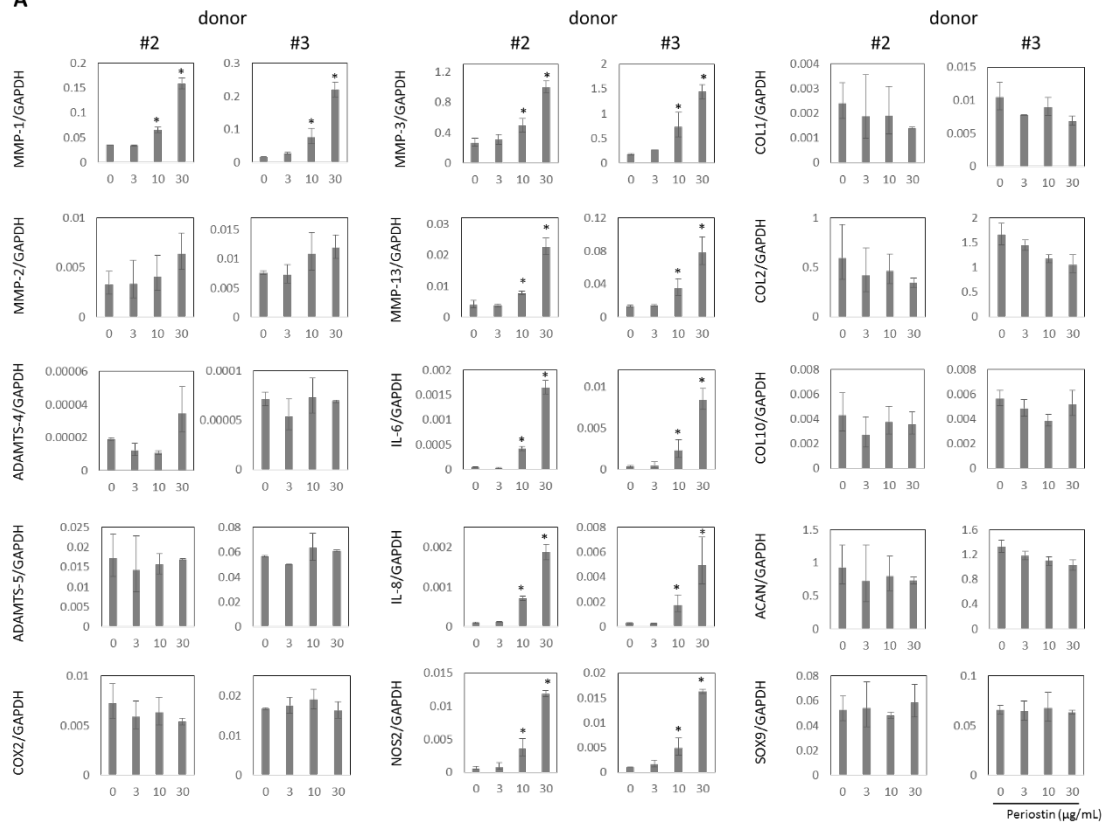**B**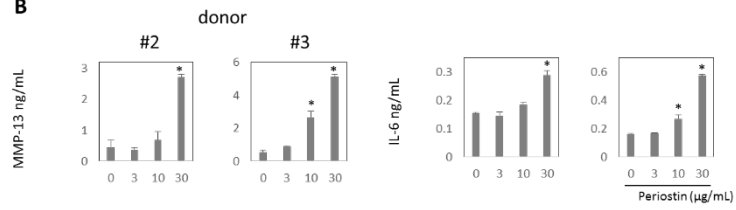

Supplement: MOESM2 [file 9752576]
